# Supplementary material for: Normative 3D opto-electronic stereo-photogrammetric posture and spine morphology data in young healthy adult population
Source: PubMed Central journal article supplement (PMC5480974; doi:10.1371/journal.pone.0179619), 2017-06-22
Supplement: pone.0179619.s003.pdf [file pone.0179619.s003.pdf]

**S1 Table. Sagittal Spine Morphology: Agreement between Angles Computed from Profile of Spinous Processes and Angles Reported in X-ray Based Literature.**

| <b>KYPHOSIS</b>                          | <b>Arm position</b>                                               | <b>Position along the Spine and n. of included Vertebrae</b> | <b>Average ± SD</b> | <b>Range Min-Max</b> |
|------------------------------------------|-------------------------------------------------------------------|--------------------------------------------------------------|---------------------|----------------------|
| D'Amico et al. (current study) (n = 124) | Free neutral along the side of trunk                              | TKA                                                          | 45.98±8.75°         | 25.2° – 76.3°        |
|                                          |                                                                   | T1-T12                                                       | 42.56±8.89          | 15.0° – 64.8°        |
|                                          |                                                                   | T4-T12                                                       | 31.9±7.65           | 14.2° – 51.6°        |
|                                          |                                                                   | KCL (n. of Vertebrae)                                        | 10.25±1.11          | 7 – 14               |
| Amabile et al. 2016 [74] (n = 69) T1-T12 | Hands resting on the mandibles                                    | T1-T12                                                       | 49°±13°             | N.A.                 |
| Amabile et al. 2016 [74] (n = 69) T4-T12 |                                                                   | T4-T12                                                       | 35.1°±11.5°         | N.A.                 |
| Roussouly et al. 2005 [94] (n=160)       | Hands are placed on rests humerus about 45° with respect to trunk | T1 - Lower Inflection Point                                  | 46.4°               | 22.5° - 70.3°        |
| Vialle et al. 2005 [71] (n = 300)        | Arms flexed forward to 45° and resting on support                 | T4 - T12                                                     | 40.6°±10°           | N.A.                 |
|                                          |                                                                   | T4 - Lower inflection point                                  | 41.2±10°            | N.A.                 |
| Fon et al. 1980 [73] (n =37)             | Arms above the shoulder in the lateral view                       | T1 - T12                                                     | 26.27° ± 8.12°      | 13° - 48°            |
| <b>LORDOSIS</b>                          | <b>Arm position</b>                                               | <b>Position along the Spine and n. of included Vertebrae</b> | <b>Average ± SD</b> | <b>Range Min-Max</b> |
| D'Amico et al. (current study) (n = 124) | Free neutral along the side of trunk                              | LLA Males                                                    | 32.8±8.09           | 12.5° – 54.8°        |
|                                          |                                                                   | LLA Females                                                  | 44.20±9.66          | 24.3° – 68.3°        |
|                                          |                                                                   | L1-L5 Males                                                  | 25.65°±9.38°        | 4.0° – 53.0°         |
|                                          |                                                                   | L1-L5 Females                                                | 39.45±8.97          | 16.9° – 60.0°        |
|                                          |                                                                   | LCL Males (n. of Vertebrae)                                  | 7.9±1.34            | 5 – 10               |
|                                          |                                                                   | LCL Females (n. of Vertebrae)                                | 6.84±1.36           | 4 – 10               |
| Vialle et al. 2005 [71] (n = 300)        | Arms flexed forward to 45° and resting on support                 | Upper inflection point - S1 Male                             | 59.2±10.12          | N.A.                 |
|                                          |                                                                   | Upper inflection point - S1 Female                           | 62±10               | N.A.                 |
|                                          |                                                                   | L1-L5 Males                                                  | 41.4±11             | N.A.                 |

|                                                           |                                                                   |                             |              |             |
|-----------------------------------------------------------|-------------------------------------------------------------------|-----------------------------|--------------|-------------|
|                                                           |                                                                   | L1 - L5 Females             | 46.2±11      | N.A.        |
| Been and Kalichman 2014 [72] (n = 101)                    | Arms folded on the chest                                          | L1-L5                       | 39.6°        | N.A.        |
|                                                           |                                                                   | L1- S1                      | 51.3°±10.7°  | N.A.        |
| Roussouly 2005 [94] (no gender separation) (n = 160)      | Hands are placed on rests humerus about 45° with respect to trunk | Upper inflection point - S1 | 61.43°±9.72° | N.A.        |
|                                                           |                                                                   | LCL (n. of Vertebrae)       | 4.5 ± 0.9    | 1.5 - 7.5   |
| Korovesiss et al. 1998 [91] (n = 99)                      | N.A.                                                              | L1-L5                       | 45.7°        | N.A.        |
| Cheng et al. 1998 [96] (n = 387)                          | N.A.                                                              | L1-L5                       | 41.95°       | N.A.        |
| Tüzün et al. 1999 [101] (n = 150)                         | N.A.                                                              | L1-L5                       | 45.85°       | N.A.        |
| Guigui et al. 2003 [102] (n = 250)                        | N.A.                                                              | L1-L5                       | 43°          | 13.6° - 69° |
|                                                           |                                                                   | L1- S1                      | 59°          | N.A.        |
| Damasceno et al. 2006 [89] (n = 350 no gender separation) | Arms laid on a support in front of the body                       | L1-L5                       | 45.1°        | 15° - 78°   |
|                                                           |                                                                   | L1-S1                       | 60.9°        | 33° - 89°   |
| Amabile et al. 2016 [74] (no gender separation) (n = 69)  | Hands resting on the mandibles                                    | L1 - L5                     | 46.4°±11.9°  | N.A.        |
|                                                           |                                                                   | L1- S1                      | 57.6°±12.8°  | N.A.        |
| Jackson and McManus, 1994 [87] (n = 100)                  | N.A.                                                              | L1-S1                       | 60.9°        | 31° - 88°   |
| Jackson et al. 1998 [100] (n = 50)                        | N.A.                                                              | L1- S1                      | 62.1°        | 41° - 86°   |
| Tsuji et al. 2001 [103] (n = 489)                         | N.A.                                                              | L1-S1                       | 54.2°        | N.A.        |

N.A. = Not Available
